# Supplementary material for: The emergence and ongoing convergent evolution of the N501Y lineages coincides with a major global shift in the SARS-CoV-2 selective landscape
Source: bioRxiv or medRxiv preprint supplement (doi:10.1101/2021.02.23.21252268), 2021-07-25
Supplement: Supplementary file [file media-1.pdf]

| Nucleotide | Site       | V1 selection | V2 selection | V3 selection | Reference composition | V1 composition | V2 composition | V3 composition |
|------------|------------|--------------|--------------|--------------|-----------------------|----------------|----------------|----------------|
| 1261       | ORF1A/333  |              | 1+           |              | T78L1                 | T279           | T90M4          | T3             |
| 1462       | ORF1A/400  |              | 1+           |              | G78D1                 | G277-2         | G91C2-1        | G3             |
| 1642       | ORF1A/460  | 0+           |              |              | N79                   | N273Y5-1       | N94            | N3             |
| 1810       | ORF1A/516  |              | 1+           |              | A76T1V1S1             | A279           | A92V1-1        | A3             |
| 1819       | ORF1A/519  | 1+           |              |              | G78S1                 | G277S2         | G92S1-1        | G3             |
| 2032       | ORF1A/590  |              | 1+           |              | L78F1                 | L277F1-1       | L93F1          | L2-1           |
| 2257       | ORF1A/665  |              | 1+           |              | V78I1                 | V278-1         | V90A3I1        | V3             |
| 2695       | ORF1A/811  |              | 1+           |              | N78V1                 | N276-3         | N91-3          | N2-1           |
| 2698       | ORF1A/812  |              | 1            |              | T78I1                 | T276-3         | T91-3          | T2-1           |
| 2839       | ORF1A/859  | 1+           |              |              | A75                   | A493V2         | A205-4         | A4-1           |
| 3265       | ORF1A/1001 | 1+           |              |              | T74I1                 | I493-1T1       | T208-1         | T5             |
| 3637       | ORF1A/1125 | 2+           |              |              | G75                   | G481C12S1R1    | G208-1         | -4G1           |
| 3685       | ORF1A/1141 | 1+           |              |              | H75                   | H492Y3         | H207-2         | -4H1           |
| 3805       | ORF1A/1181 | 1+           |              |              | N75                   | N490S5         | N207D1-1       | N5             |
| 4963       | ORF1A/1567 | 1+           |              |              | T73I2                 | T488A6-1       | T209           | T5             |
| 5386       | ORF1A/1708 | 1+           |              |              | A75                   | D489-5A1       | A202-7         | A5             |
| 5494       | ORF1A/1744 |              | 1+           |              | C75                   | C490-5         | C201-4S4       | C5             |
| 5647       | ORF1A/1795 |              |              | 1+&          | K75                   | K495           | K209           | Q5             |
| 6799       | ORF1A/2179 |              | 1+           |              | L75                   | L495           | L206F3         | L5             |
| 6865       | ORF1A/2201 |              | 1+           |              | N75                   | N495           | N201-5Y3       | N5             |
| 7726       | ORF1A/2488 |              | 2+           |              | S75                   | S491-3F1       | S204F4-1       | S5             |
| 8557       | ORF1A/2765 |              | 1+           |              | I120N1                | I126-1         | I55N1-1        | I2             |
| 8560       | ORF1A/2766 |              | 1+           |              | V120I1                | V126-1         | V56-1          | V2             |
| 8659       | ORF1A/2799 |              | 1+           |              | H119Q1-1              | H125-1Y1       | H49Y7-1        | H1-1           |
| 8962       | ORF1A/2900 |              | 1+           |              | S121                  | S127           | S50L7          | S2             |
| 9205       | ORF1A/2981 |              | 1+           |              | S120F1                | S126F1         | S56F1          | S2             |
| 9343       | ORF1A/3027 |              | 1+           |              | L120F1                | L127           | L55F2          | L1-1           |
| 9640       | ORF1A/3126 | 2+           |              |              | I119V1T1              | I123V3T1       | I57            | I2             |
| 11194      | ORF1A/3644 |              | 1+           |              | L41F1                 | L69F1          | L41F2          | L2             |
| 11233      | ORF1A/3657 |              | 1+           |              | A41V1                 | A70            | A42V1          | A2             |
| 11287      | ORF1A/3675 | 1+           | 1+           |              | S40F1A1               | -69S1          | -36S7          | -2             |
| 11290      | ORF1A/3676 | 1+           | 1+&          |              | G40S1C1               | -68G2          | -35G7S1        | -2             |
| 11293      | ORF1A/3677 | 1+           | 1+           |              | F41C1                 | -68L1F1        | -35F6L2        | -2             |
| 11416      | ORF1A/3718 | 1+           |              |              | V41F1                 | V68F2          | V41F2          | V2             |
| 11506      | ORF1A/3748 | 1+           |              |              | V41I1                 | V68I2          | V43            | V2             |
| 11551      | ORF1A/3763 |              | 1+           |              | V42                   | V70            | V41A2          | V2             |
| 11941      | ORF1A/3893 | 1+           |              |              | Q151L1H1              | Q36R1          | Q11            | Q1             |
| 12031      | ORF1A/3923 | 1+           |              |              | G153                  | G35R2          | G11            | G1             |
| 13567      | ORF1B/34   | 1+           |              |              | A70                   | A215V2-1       | A76-2          | A3             |
| 14209      | ORF1B/248  | 1+           |              |              | V70                   | V215F3         | V78            | V3             |
| 14785      | ORF1B/440  |              | 1+           |              | A70                   | A218           | A76V2          | A3             |
| 16467      | ORF1B/1001 | 1+           |              |              | P164L2S1              | P158S2         | P58            | P2             |
| 16740      | ORF1B/1092 |              | 1+           |              | V165F2                | V158-1F1       | V57F1          | V2             |
| 16761      | ORF1B/1099 | 1+           |              |              | L166F1                | L158-1F1       | L58            | L2             |
| 16812      | ORF1B/1116 | 1+           |              |              | V167                  | V158L2         | V58            | V2             |
| 17016      | ORF1B/1184 |              | 1+           |              | E164D3                | E160           | E56D2          | E2             |
| 17103      | ORF1B/1213 | 1+           |              |              | H166Y1                | H158Y1R1       | H57Y1          | H2             |
| 17256      | ORF1B/1264 |              |              | 1+&          | E166D1                | E160           | E58            | D2             |
| 17283      | ORF1B/1273 |              | 1+           |              | S166L1                | S159L1         | S57L1          | S2             |
| 17532      | ORF1B/1356 | 1+           |              |              | G167                  | G158-1C1       | G57S1          | G2             |
| 17613      | ORF1B/1383 | 1+           |              |              | K166-1                | K80R79-1       | K57E1          | K2             |
| 17892      | ORF1B/1476 |              | 1+           |              | A165S1V1              | A160           | A55V2-1        | A2             |
| 17976      | ORF1B/1504 | 1+           |              |              | L167                  | L157F3         | L58            | L2             |
| 17997      | ORF1B/1511 |              | 1+&          |              | T166I1                | T159I1         | T43I15         | T2             |
| 18078      | ORF1B/1538 |              | 1+&          |              | V152L1                | V149L1         | V47L2I1        | V5             |
| 18084      | ORF1B/1540 |              | 1+           |              | T152I1                | T149I1         | T49I1          | T5             |
| 18159      | ORF1B/1565 | 1+           |              |              | D152N1                | D149N1         | D50            | D5             |
| 18246      | ORF1B/1594 |              | 1+           |              | P151L2                | P149L1         | P49L1          | P5             |
| 19542      | ORF1B/2026 |              | 1            |              | I150-2L1              | I143-7         | I46-4          | I3-2           |
| 19545      | ORF1B/2027 | 1+           |              |              | S150V1N1-1            | S143-6K1       | S47-3          | S3-2           |
| 19674      | ORF1B/2070 |              | 1+           |              | Q66H1                 | Q86-2          | Q45H1          | Q1             |
| 20490      | ORF1B/2342 | 1+           |              |              | V66L1                 | V87L1          | V46            | V1             |
| 20760      | ORF1B/2432 |              | 1+           |              | T49I1                 | T55I1          | T23I1          | -1             |
| 21108      | ORF1B/2548 |              | 1+           |              | T50                   | T55I1          | T22I2          | T1             |
| 21574      | S/5        |              | 2+           |              | L168F9                | L439-6F5       | L146-9F5       | L3             |
| 21613      | S/18       |              | 1+           | 1+&          | L173F4                | L439-6F5       | L94F56-10      | F3             |
| 21619      | S/20       |              |              | 1+&          | T177                  | T443-6I1       | T150-10        | N3             |
| 21637      | S/26       |              | 1+           | 1+&          | P176S1                | P442-7S1       | P148-10L1R1    | S3             |
| 21640      | S/27       |              | 1+           |              | A176S1                | A440-7S2T1     | A147-10S3      | A3             |
| 21799      | S/80       |              | 1+           |              | D175Y2                | D448Y2         | A154D6         | D3             |
| 22129      | S/190      |              |              | 1+&          | R176S1                | R449-1         | R158-2         | S2R1           |
| 22204      | S/215      |              | 1+           |              | D176Y1                | D449Y1         | G141D12H5-2    | D3             |
| 22288      | S/243      |              | 0+&          |              | A177                  | A448V1S1       | -156A3T1       | A3             |
| 22345      | S/262      |              | 0+           |              | A175S2                | A440-8V1S1     | -89A70T1       | -2A1           |
| 22474      | S/305      |              | 1+           |              | S177                  | S444-6         | -94S65T1       | -2S1           |
| 22507      | S/316      |              | 1+           |              | S176-1                | S445-5         | -91S68F1       | -2S1           |
| 22513      | S/318      |              | 0+           |              | F176-1                | F445-5         | -85F74L1       | -2F1           |
| 22810      | S/417      |              | 1+&          | 1+&          | K177                  | K450           | N155K5         | T3             |
| 23011      | S/484      | &            | +            | 1+&          | E172K2A1Q1R1          | E448-2         | K145-14E1      | K2-1           |
| 23062      | S/501      |              | 1+           | 1+&          | N177                  | Y446N2-2       | Y144-15N1      | Y2-1           |
| 23269      | S/570      | 2+           |              |              | A177                  | D447-2Y1       | A159-1         | A3             |
| 23518      | S/653      |              | 1+           |              | A177                  | A449V1         | A158V2         | A3             |
| 23563      | S/668      |              | 1+           |              | A176S1                | A448-2         | A158S2         | A3             |
| 23662      | S/701      |              | 1+           |              | A175S1V1              | A448-1V1       | V160           | A3             |
| 24025      | S/822      |              | 1+&          |              | L177                  | L450           | L155F4-1       | L3             |
| 24619      | S/1020     |              | 1+           |              | A177                  | A446V3S1       | A156-2S2       | A3             |
| 24640      | S/1027     |              |              | 1+&          | T176I1                | T450           | T158-2         | I3             |
| 24913      | S/1118     | 1+           |              |              | D177                  | H448D2         | D160           | D3             |
| 25087      | S/1176     |              |              | 1+&          | V176F1                | V448-2         | V158F1-1       | F3             |
| 25216      | S/1219     |              | 1+           |              | G176C1                | G447-2V1       | G155V3-2       | G3             |
| 25461      | ORF3A/24   | 1+           |              |              | T185I2                | T159I1         | T65I1          | T2             |
| 25668      | ORF3A/93   | 1+           |              |              | H186Y1                | H159Y1         | H65-1          | H2             |
| 25686      | ORF3A/99   | 2+           |              |              | A181V3S2T1            | A155V2T2S1     | A64-2          | A2             |
| 25854      | ORF3A/155  |              | 1+           |              | D185Y1H1              | D160           | D61Y2A1H1-1    | D2             |
| 26055      | ORF3A/222  | 1+           |              |              | D184Y1N1G1            | D159N1         | D65-1          | D2             |
| 26058      | ORF3A/223  | 1+           |              |              | T181I6                | T158I2         | T65-1          | T2             |
| 26148      | ORF3A/253  |              |              | 1+&          | S187                  | S160           | S65-1          | P2             |
| 26561      | M/14       |              | 1+           |              | K48E1F1               | K66            | K33R1          | K1             |
| 26753      | M/78       | 1+           |              |              | G48C1D1               | G63-1S1C1      | G34            | G1             |
| 27149      | M/210      |              | 1+           |              | H50                   | H66            | H31R2-1        | H1             |
| 27155      | M/212      |              | 1+           |              | S50                   | S65N1          | S28R5-1        | S1             |
| 28250      | ORF8/120   |              | 0+           |              | F40V2L2Y1-1S1Q1       | F57L4H1T1V1    | F24V3L2        | F1             |
| 28253      | ORF8/121   | 0+           | 1+           |              | I37L4S3-1V1F1T1       | I53F4L3S2K1T1  | I19L6F2S1-1    | I1             |
| 28279      | N/3        | 2+           |              |              | D80L1                 | L217D3E1       | D85            | D4             |
| 28342      | N/24       | 1+           |              |              | T81                   | T219I2         | T84I1          | T4             |
| 28510      | N/80       |              |              | 1+&          | P81                   | P220L1         | P84L1          | R4             |
| 28753      | N/161      | 1+           |              |              | L81                   | L219F2         | L85            | L4             |
| 28816      | N/182      |              | 1+           |              | A80S1                 | A218-1V1S1     | A84S1          | A4             |
| 28876      | N/202      |              |              | 1+&          | S80N1                 | S221           | S84-1          | S4             |
| 28927      | N/219      | 1+           |              |              | L81                   | L214I3-2F1V1   | L84-1          | L4             |
| 28975      | N/235      | 2+           |              |              | S80V1                 | F216-3S2       | S85            | S4             |

Selection legend

1. # : episodic selection with this many specific branches
2. + : pervasive positive
3. - : pervasive negative
4. & : different from reference
